# Supplementary material
Source: ML conference proceedings conference paper supplement (https://openaccess.thecvf.com/content/CVPR2026/html/Xia_R4Det_4D_Radar-Camera_CVPR_2026_paper.html)
Supplement: Supplementary file 1 [file Xia_R4Det_4D_Radar-Camera_CVPR_2026_supplemental.pdf]

# R4Det: 4D Radar-Camera Fusion for High-Performance 3D Object Detection

## Supplementary Material

### A. Additional ablation of the PDF module

Table 8 further presents the experimental process of adjusting the loss weight of the PDF module. Sensitivity analysis (C1–C4) shows that slight variations of  $\lambda_1$ ,  $\lambda_3$ ,  $\lambda_{\text{dense}}$ , or  $\lambda_{\text{abs}}$  lead to minor performance drops, confirming that the final setting (C5) achieves a balanced trade-off between stability and accuracy.

Table 8. **Ablation of the Panoramic Depth Fusion module.** Each setting corresponds to different combinations of loss components.

| Setting                                 | $\lambda_1$ | $\lambda_{\text{abs}}$ | $\lambda_{\text{dense}}$ | $\lambda_3$ | BEV mAP $\uparrow$ |
|-----------------------------------------|-------------|------------------------|--------------------------|-------------|--------------------|
| A                                       | 0.1         | 0.01                   | –                        | –           | 45.15              |
| B (+ $\lambda_{\text{dense}}$ )         | 0.1         | 0.01                   | 0.03                     | –           | 46.08              |
| C1 ( $\downarrow\lambda_1$ )            | 0.05        | 0.01                   | 0.03                     | 0.05        | 46.64              |
| C2 ( $\downarrow\lambda_3$ )            | 0.1         | 0.01                   | 0.03                     | 0.02        | 46.30              |
| C3 ( $\uparrow\lambda_{\text{dense}}$ ) | 0.1         | 0.01                   | 0.05                     | 0.05        | 46.45              |
| C4 ( $\uparrow\lambda_{\text{abs}}$ )   | 0.1         | 0.03                   | 0.03                     | 0.05        | 46.12              |
| <b>C5 (ours)</b>                        | 0.1         | 0.01                   | 0.03                     | 0.05        | <b>46.86</b>       |

### B. Additional ablation of the DGTF module

We also examine temporal depth sensitivity (Table 9): using the immediate predecessor ( $t-1$ ) achieves the best accuracy and stability, whereas fusing more distant frames ( $t-2$ ,  $t-3$ ) leads to noise accumulation.

Table 9. **Sensitivity to historical frame gap.** Evaluation of different historical fusion depths. Single-step ( $t-1$ ) achieves the best accuracy and stability.

| Fusion Depth | BEV mAP      | 3D mAP       |
|--------------|--------------|--------------|
| $t$ & $t-3$  | 49.20        | 42.74        |
| $t$ & $t-2$  | 49.87        | 43.12        |
| $t$ & $t-1$  | <b>50.41</b> | <b>44.86</b> |

### C. Qualitative Analyses of the DGTF module

R4Det is the first to validate the feasibility of temporal modeling on these two datasets. As shown in the Figure 8, the learned offsets  $\Delta p$  (red arrows) can align with object motion, reconstructing relative motion flow, while the mask  $m$  precisely suppresses the background. This physically proves DGTF performs explicit, physics-based motion alignment.

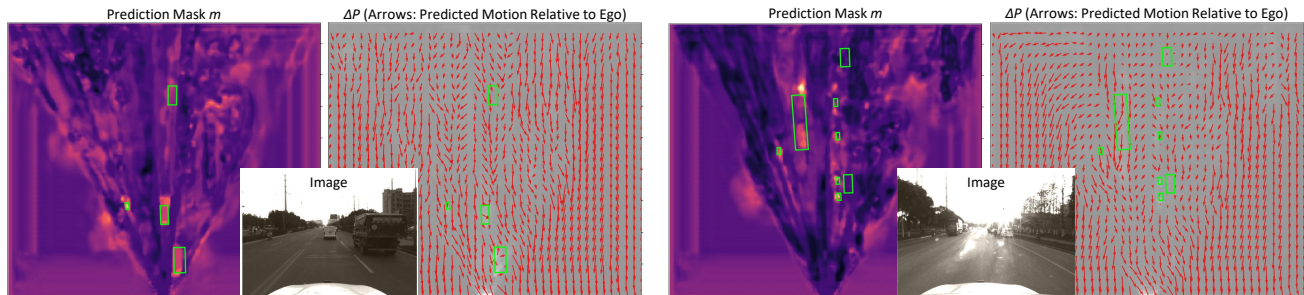

Figure 8. **DGTF Visualization.** Learned offsets ( $\Delta p$ , red arrows) align strictly with vehicle motion, while the mask ( $m$ , heatmap) suppresses background, proving explicit temporal alignment.
